## Gene expression

**GoArrays: highly dynamic and efficient microarray probe design**Sébastien Rimour<sup>1,\*</sup>, David Hill<sup>1</sup>, Cécile Milton<sup>2</sup> and Pierre Peyret<sup>2</sup><sup>1</sup>LIMOS UMR CNRS 6158, Blaise Pascal University, Clermont-Ferrand II, BP 10125, 63177 Aubiere Cedex, France and <sup>2</sup>LBP UMR CNRS 6023, Blaise Pascal University, Institut Universitaire de Technologie, Clermont-Ferrand I University BP 86, 63177 Aubiere Cedex, France

Received on July 15, 2004; revised on October 22, 2004; accepted on October 28, 2004

Advance Access publication November 5, 2004

**ABSTRACT**

**Motivation:** The use of oligonucleotide microarray technology requires a very detailed attention to the design of specific probes spotted on the solid phase. These problems are far from being commonplace since they refer to complex physicochemical constraints. Whereas there are more and more publicly available programs for microarray oligonucleotide design, most of them use the same algorithm or criteria to design oligos, with only little variation.

**Results:** We show that classical approaches used in oligo design software may be inefficient under certain experimental conditions, especially when dealing with complex target mixtures. Indeed, our biological model is a human obligate parasite, the microsporidia *Encephalitozoon cuniculi*. Targets that are extracted from biological samples are composed of a mixture of pathogen transcripts and host cell transcripts. We propose a new approach to design oligonucleotides which combines good specificity with a potentially high sensitivity. This approach is original in the biological point of view as well as in the algorithmic point of view. We also present an experimental validation of this new strategy by comparing results obtained with standard oligos and with our composite oligos. A specific *E.cuniculi* microarray will overcome the difficulty to discriminate the parasite mRNAs from the host cell mRNAs demonstrating the power of the microarray approach to elucidate the lifestyle of an intracellular pathogen using mix mRNAs.

**Availability:** Our method is implemented in the GoArrays software, available at <http://www.isima.fr/bioinfo/goarrays/>

**Contact:** rimour@isima.fr for computing part, and pierre.peyret@univ-bpclermont.fr for collaborative projects.

**INTRODUCTION**

Thanks to the increasing number of completely sequenced genomes (Bernal *et al.*, 2001) the understanding of complex biological processes can benefit global approaches. Among the recent post-genomic developments, DNA microarray represents probably the most powerful tool. The DNA chip technology was first developed to evaluate simultaneously the expression levels of all the genes of an organism (DeRisi *et al.*, 1997; Lipshutz *et al.*, 1999; Lockhart *et al.*, 1996; Schena *et al.*, 1995). Other applications different from gene expression monitoring have been applied using DNA

chips (specific mutation detections, microbial identification, comparative genomic hybridization, chromatin immunoprecipitation chips, etc.). The general concept of this nanotechnology development is based on the capacity to immobilize tens of thousands of specific probes on a small solid surface. More than 400 000 sequences representing up to 13 000 genes and expressed sequence tags can be deposited on a surface of 1.6 cm<sup>2</sup> (Lockhart and Barlow, 2001). A highly specific recognition step between the probes and the labeled targets (mRNA) is obtained via complementary base pairing during nucleic acid hybridization process. For the production of arrays, DNA can either be directly synthesized on the solid support (Lipshutz *et al.*, 1999; Hughes *et al.*, 2001) or can be deposited in a pre-synthesized form onto the surface with pins or ink jets printers (Goldmann and Gonzalez, 2000). The spotted DNA corresponds to genomic DNA, cDNAs, PCR products or oligonucleotides.

DNA oligonucleotide microarrays have become more popular compared to cDNA microarrays for gene profiling and are now preferentially set up. Construction of cDNA microarrays presents a number of difficulties, largely related to costs associated with clones validation, quality controls and propagation. Other limitations of cDNA microarrays are observed because of cross-hybridization with homologous genes or alternative splice variants. On the other hand, several reports highlight the excellent sensitivity and specificity of oligonucleotide microarrays and the easiness to obtain these arrays that only require sequence data (Hughes *et al.*, 2001; Kane *et al.*, 2000; Relogio *et al.*, 2002; Wang and Seed, 2003). For example a 60mer oligonucleotide microarray can reach a sensitivity level close to one copy of mRNA per human cell and a single oligonucleotide per gene is sufficient to monitor gene expression (Hughes *et al.*, 2001).

Probe design for microarray is not a trivial computational task. Parameters such as probe length, number of oligos per CDS, maximal distance from the 3' end (to avoid the bias toward the 3' end generated by abortive reverse transcription when targets are labeled using oligodT to anchor the reaction), melting temperature range, threshold to reject secondary structures (to avoid interference during hybridization step), prohibited sequences and of course specificity have to be considered to obtain an efficient design. The cross-hybridization is the major point that limits the determination of specific probes. During classical hybridization experiments, cross-hybridization is limited by increasing the stringency of hybridizations conditions. However, it is not possible to apply the most stringent conditions for all the genes of an organism at the same time. In

\*To whom correspondence should be addressed.

fact, cross-hybridization of a CDS to other sequences may result from a single continuous alignment exceeding cross-hybridization parameters or from a discontinuous series of short similarity regions (within the same subject) appearing as several alignments which all together exceed the cross hybridization parameters. In the yeast *Saccharomyces cerevisiae* 253 CDS (4.5% of the total CDSs) failed to be represented by a 'unique' oligonucleotide probe (Talla *et al.*, 2003). Even with an improved version of OligoArray (2.0) where the computation of the specificity is based on the thermodynamics of the hybridization, 7% of the *Arabidopsis thaliana* CDSs stay alone, eliminating the possibility of designing a specific probe (Rouillard *et al.*, 2003). The percentage will increase with the complexity of the considered biological model.

Concerning the specific probe design for a human obligate parasite like our biological model, the microsporidia *Encephalitozoon cuniculi*, the situation will be more dramatic. By a conventional probe design we were able to determine specific 50mer oligonucleotides for only approximately 40% of the CDSs. These results prompted us to develop a highly dynamic probe design (GoArrays) that led to the determination of specific oligonucleotide for almost all the CDS except of course for perfect gene duplication.

The remainder of this paper is organized as follows. In the Methods section, after presenting a short review of existing software for microarray oligonucleotide design, we show the limits encountered, particularly when dealing with complex biological models, and we propose a new oligo design approach which enables bypassing the previously cited limits. The implementation section deals with our computational choices for developing this new approach. Then, we present the experimental verification before discussing the observed results.

## METHODS

### Related work

Although there are more and more publicly available programs for microarray oligonucleotide design, most of them use the same algorithm or criteria to design oligos, with only little variation (Chen and Sharp, 2002; Li and Stormo, 2001; Nielsen *et al.*, 2003; Raddatz *et al.*, 2001; Rahmann, 2003; Reymond *et al.*, 2004; Rouillard *et al.*, 2002, 2003; Talla *et al.*, 2003; Wang and Seed, 2003). They primarily differ by the criteria chosen to select the oligonucleotides: some will take into account the possibility of an oligonucleotide having a stable secondary structure under certain conditions, others will make it possible to exclude certain sequence patterns determined by the user, such as the repetition of a single base. None of them gathers the whole set of criteria.

From a data-processing point of view, one can separate the different programs in two groups: the client/server group and the autonomous software group. In the case of an application of the client/server type, the user employs a small software client to send the data to a server, generally located in the laboratory which developed the oligo design software. This laboratory carries out the calculation of the oligos and then sends the results to the customer. The advantages of this type of applications are mainly that the final user does not need to have large local computing facilities at his disposal and that the software client is often very easy to install and to use over the Internet.

The major drawback of this type of remote application is that the database used to test the specificity of the oligos must be present on the server, which limits the possibilities. Indeed, we generally find on servers only the principal genomes studied in biology, those of the model organisms. If the user carries out DNAChip experiments on less studied organisms, he will not be able to use such software or will have to contact the administrator of the server to add a database. In addition, the achievement of calculation is dependent on

the server availability and the confidentiality of the data is not guaranteed though some scientists are currently explicitly working on this point (Kurata *et al.*, 2003).

However when the server software is easily accessible, it is possible to install it on a dedicated machine, making it similar to an autonomous software. In the case of autonomous software, the user completely controls the configuration of the parameters of the oligonucleotides design and is not dependent on a distant machine. However, the applications of this type are more difficult to install, require a significant amount of computing power and sometimes need other software to function like BLAST (Altschul *et al.*, 1997) and/or Mfold (SantaLucia, 1998; Zuker *et al.*, 1999).

*Client/server software* OligoWiz (Nielsen *et al.*, 2003) is composed of a free Java client (data input and display of results) and a Perl server (under Unix) hosted by CBS (Center for Biological Sequence analysis, Denmark: <http://www.cbs.dtu.dk/services/OligoWiz/>). The oligonucleotide searching method is the following: for each potential oligonucleotide, the program takes into account five parameters and for each one of these parameters, it calculates a score for the oligonucleotide. It makes then a balanced sum (by user-defined coefficients) of the scores and returns the oligonucleotide having obtained the best score. The originality of this software is that the user can also graphically visualize the scoring functions of all the potential oligonucleotides and manually select some of them. The criteria taken into account for the search are: specificity, melting temperature (T<sub>m</sub>), position within transcript, complexity of the sequence and its composition in bases other than ATCG.

Another client/server software (ROSO) has been recently proposed by the French Biopole of Lyon (Reymond *et al.*, 2004). Accessible via a website, the software is written in C and uses BLAST to compute the specificity (<http://pbil.univ-lyon1.fr/roso/>). It is possible to obtain the source and executable code on demand. The search algorithm is composed of five steps:

- (1) Filtering of the sequences provided in input (elimination of identical genes, of the repetitions of bases...).
- (2) Search of potential cross-hybridizations using BLAST.
- (3) Elimination of oligonucleotides having a stable secondary structure.
- (4) Calculation of the T<sub>m</sub> of each candidate oligonucleotide and selection of a set of oligonucleotides (at least one by gene) which minimizes the variability of the T<sub>m</sub>.
- (5) Selection of the final set of oligonucleotides on four criteria (composition in GC, first and last bases, repetitions, free energy).

*Autonomous software* OligoArray (Rouillard *et al.*, 2002) is written in Java, freely distributed and its source code is available under the GPL (General Public Licence). The criteria taken into account for the search for oligonucleotides are: specificity, position in transcript, melting temperature, secondary structure of the oligonucleotide and presence of specific patterns in the sequence of the oligonucleotide. The strategy adopted by OligoArray is as follows: given a sequence provided in input, it extracts a sub-sequence made up of the *N* last bases (*N* being the length desired for the oligos) and checks the set of the criteria cited above. If this sub-sequence meets all the criteria, it will constitute a satisfactory oligonucleotide, and the program passes to the following gene. In the opposite case, the program carries out a shift of 10 bases towards end 5' of the CDS, extracts again a sub-sequence and checks the criteria. The process continues until a satisfactory oligonucleotide is found. If no oligonucleotide is found, the program returns the oligonucleotide presenting the less potential cross-hybridization (<http://berry.engin.umich.edu/oligoarray/>). OligoArray 2.0 (Rouillard *et al.*, 2003) is an evolution of the software with a slightly different approach using thermodynamics to design oligonucleotides (<http://berry.engin.umich.edu/oligoarray2/>).

Another software named ProbeSelect retained our attention though the algorithm used is quite complex. ProbeSelect is written in C++ under Sun Solaris (Li and Stormo, 2001) and the approach to find oligonucleotides

is centered on the specificity of sequences. Its functioning requires seven steps:

- (1) Construction of a 'suffix array' for the set of coding sequences issued from the genome of the considered organism.
- (2) Construction of a 'landscape' for each gene provided in the input.
- (3) Use of these structures to determine a list (10–20) of candidate oligonucleotides for each gene (sequences which minimize the sum of the frequencies of their sub-words in the whole studied genome).
- (4) For each oligonucleotide candidate, search of potential cross-hybridizations.
- (5) Localization of these crossed-hybridizations within genes.
- (6) Calculation of free energy and of the  $T_m$  for each hybridization.
- (7) Selection of the oligonucleotides which have the most stable hybridization with their target and which allow a good discrimination of the other potential targets.

Some autonomous oligonucleotides design programs are written in Perl or are based on a set of Perl scripts. They are usually much slower than those written in C++. OligoPicker (Wang and Seed, 2003) is a Perl program which also uses a traditional approach. The criteria taken into account are specificity (use of BLAST), melting temperature and position in the transcripts (<http://pga.mgh.harvard.edu/oligopicker/>). ProMide (Rahmann, 2003) is a set of Perl scripts, with a C program for main computation, that uses the longest common factor as a specificity measure for the oligonucleotides. It uses complex data structures such as 'enhanced suffix array' and some statistical properties of sequences (<http://oligos.molgen.mpg.de/>). Oliz (Chen and Sharp, 2002) is also a set of Perl scripts using a classical approach (using BLAST for specificity testing). It however requires additional software to function (cap3, clustalw, EMBOSS prima) plus a database in the UniGene format. The originality of the method used comes from the fact that the oligonucleotides are searched in area 3' UTR (untranslated region) of the mRNAs, a very specific area where sequences are largely available through EST (expressed sequence tag) projects (<http://www.utm.edu/pharmacology/otherlinks/oliz.html>).

### Limits of existing software

**The specificity problem** Concerning the design of probe sets for microarrays, the specificity of oligonucleotides is one of the most important points, among all criteria that probes must satisfy. The optimum probe for a gene should hybridize only with the transcripts of this gene (under hybridization conditions) and not with other transcripts present in the hybridization pool. To select such a probe, one must know in what condition an oligonucleotide could hybridize with a non-target gene, especially in terms of sequence homology. Although few biological studies were made to answer this question, a very complete one has been achieved on 50mer oligonucleotides (Kane *et al.*, 2000). They show that a probe must satisfy two conditions to be specific:

- (1) The oligonucleotide sequence must not have more than 75% of similarity (among all sequence) with a non-target sequence present in the hybridization pool.
- (2) The oligonucleotide sequence must not include a stretch of identical sequence >15 contiguous bases.

Many probe design software use Kane's criteria to verify the specificity of oligonucleotide (OligoArray, OligoWiz), and they extend it for oligonucleotides of any length. ProbeSelect uses the number of mismatches between the oligonucleotide and the non-target sequence. They may cross-hybridize if there are four or fewer mismatches for short oligos (around 20mer), 10 or fewer mismatches for 50mer, and 20 or fewer for 70mer.

In our study, we follow Kane's criteria and consider that a probe may show cross-hybridization with a non-target sequence when it does not satisfy conditions (1) and (2). In a rather obvious way, the longer the oligonucleotide is, the easier is condition (1) satisfied. However, it is more complex for condition (2): as the length increases, the probability of finding a stretch of 15 identical bases increases.

**Limits when dealing with a complex biological model** The microarrays we produce are designed to elucidate the adaptation mechanisms involved in a parasitic life style. Our biological model is the emerging opportunistic parasite *E.cuniculi*. The genome of this pathogen, considered as the smallest eukaryotic genome with a size of only 2.9 Mb, has been completely sequenced by our research team and the French Genoscope (Katinka *et al.*, 2001). This parasite represents an increasing danger to human health because of the increase in the number of immuno-depressed people (following diseases like AIDS, chemotherapies...). Regarding microarray experiments, the originality of our study is that targets which are extracted from biological samples are composed of a mixture of *E.cuniculi* transcripts and host cell transcripts (human cell in our case), which cannot be separated. A specific *E.cuniculi* microarray will overcome the difficulty of discriminating the parasite mRNAs from the host cell mRNAs, demonstrating the power of the microarray approach to elucidate the lifestyle of an intracellular pathogen using mix mRNAs. Thus, the oligonucleotides designed for the genes of the parasite must be specific not only regarding the whole parasite CDSs, but also regarding human genome (as human transcripts are present in the target mixture). This induces an additional difficulty in the design of specific probes by increasing the complexity of the database.

When we try to design 50mer probes for our biological model with classical software (using Kane's criteria), we find only a few specific ones. Most of the oligonucleotides show cross-hybridization with human genes, because they do not satisfy condition (2) of Kane's criteria. If we reduce the length of the oligonucleotides, we may find more oligonucleotides satisfying this condition but the risk of having more than 75% of similarity with a non-target sequence increases. In the next part, we discuss the *in silico* tests we performed to explore the influence of oligonucleotide length on specificity.

**In silico tests** We performed *in silico* tests on two databases: the relatively small genome of the yeast *Saccharomyces cerevisiae* and our model *E.cuniculi*. In the second case, when we want to design an oligonucleotide, we must check its specificity against a database that consists of the union of *E.cuniculi* genome and human genome (Unigene database). For each organism, we randomly chose 100 CDSs and for each CDS, we checked the specificity of a set of oligonucleotides extracted from these CDSs (non-overlapping oligos). We report how many times an oligonucleotide 'matches' with a sequence present in the database. An oligonucleotide 'matches' when it does not satisfy Kane's criteria, and thus it is not specific. Hits are found with the BLAST algorithm, and then the whole oligonucleotide sequence is aligned with subject sequence in the database to check Kane's conditions. We use the smallest value allowed for BLAST word size ( $W = 7$ ) and a maximum expectation value of 100 to ensure that we find all hits. The total number of matches is considered as a measure of specificity of oligonucleotides of a given length. The results are shown in Figure 1.

The same trend is observed for the two organisms: 20mer oligos have many more matches with the database than other lengths and may not be suitable for oligonucleotide design. However, from 30 to 80mer, we can observe that the specificity is reduced with the increase of the oligonucleotide size. This confirms that for long oligonucleotides, many hits are achieved because they do not satisfy condition (2) of Kane's criteria. Values for *E.cuniculi* are higher and the increase is more marked as the database contains more sequences. These results highlight the risk of cross-hybridization with long oligo microarrays in a complex biological system. Shorter oligonucleotides (above 20mer) increase specificity but could induce a lower sensitivity. Furthermore, Kane's criteria may be too strict for short oligonucleotides and in the rest of the paper, we modify condition (1) by considering the percentage of similarity only among the BLAST alignment and not among all sequences. This enables us to find specific sequences even shorter (20–25mer) for some CDSs.

In the next part, we present a new method for oligonucleotide design that enables us to solve the problem of specificity in a complex biological system retaining a high sensitivity for long oligonucleotides.

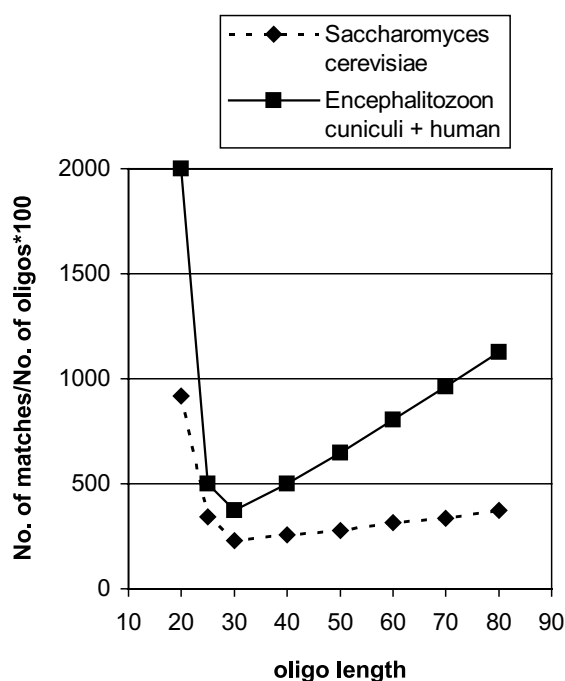

**Fig. 1.** *In silico* estimation of length–specificity relationship in *S.cerevisiae* (yeast) genome and in a complex biological system (*E.cuniculi* + human transcripts). For each organism, a set of oligonucleotides (non-overlapping oligonucleotides from 100 randomly chosen CDS) is tested for specificity against the database. Total number of matches with the database is reported. For a short oligo length, more oligonucleotides are tested than for longer lengths. Thus, the number of matches is normalized to the total number of oligonucleotides tested of a given length.

## A new approach

**New kind of oligonucleotide structure** The *in silico* test shows that in a complex biological system, ‘long’ oligonucleotides are not suitable for good specificity. Specificity increases as the oligonucleotide length decreases and short oligonucleotides between 20 and 30mer seem to be more adapted. However the use of such probes could induce a lower sensitivity. We propose a new approach to design oligonucleotides that combines excellent specificity (even with a complex database) with a potentially high sensitivity.

In our strategy, the oligonucleotide sequence is the concatenation of two sequences that are complementary to their target cDNA but which are disjoint (Fig. 2). Thus, the determination of an oligonucleotide is made by searching two ‘short’ sequences (e.g. 25mer) that are each specific to the CDS (it is easier to find two short specific sequences than one long sequence). Stable hybridization between the composite probe and the cDNA target induces the formation of a loop. In the oligonucleotide sequence, we also insert a very short random linker (3–6 bases) between the two specific sequences to facilitate the formation of the transcript loop. As the oligonucleotide sequence length is still quite long (e.g. 55mer), we keep the advantage of high signal intensity of long oligonucleotides. We then developed the program which enables the design of microarray oligonucleotides according to this new approach.

## IMPLEMENTATION

For the software analysis, we defined a platform independent model (PIM) for the oligonucleotide design compliant with the current MicroArray gene expression object-model (MAGE-OM) (OMG, 2003; [http://www.omg.org/technology/documents/formal/gene\\_expression.htm](http://www.omg.org/technology/documents/formal/gene_expression.htm)) specified by the Object Management Group

(OMG). The MAGE-OM is a Unified Modeling Language (UML) model which attempts to define standard objects for gene expression data interchange. Before any programming, we proposed a metamodel of oligonucleotide design, which is MAGE-OM compliant in order to follow the state of the art in software development for life sciences as advised by the model driven architecture (MDA) (Hill *et al.*, 2002). This rather important choice increases the software quality and the potentiality of the algorithm, thus enabling an easier integration in a microarray software environment. We used this metamodel to implement our oligonucleotide design software, GoArrays. This software enables one to design specific probes for microarray according to our new approach (Fig. 3). It is particularly well adapted to complex biological systems, when classical software is inefficient. The GoArrays prototype is written in Java, and requires the Blast standalone program and the MFold software if a user wants to check the secondary structure of the oligos. The program takes several user-defined parameters via a graphical interface. It requires two input files, one containing all the sequences for which we want to design an oligonucleotide, and the second containing the specificity database. This second database must contain all the sequences that may be present in the targets mRNA mixture during the hybridization step. The user chooses the length  $l$  of the two subsequences constituting the oligonucleotide, the minimal and maximal loop size  $l_{o_{min}}$  and  $l_{o_{max}}$ , and the size of the linker separating the two subsequences. The user also sets the specificity threshold, which is the minimal length of a stretch of identical bases with non-target sequence that may lead to cross-hybridization (the default is Kane’s criterion: 15 bases). Then, the user can choose if they want the oligonucleotide to satisfy other classical criteria: melting temperature, absence of stable secondary structure, absence of forbidden sequences etc. If it is the case, they set the minimal and maximal melting temperature desired, and the maximal melting temperature for the secondary structure.

The algorithm takes each input sequence and reads it from the 3’ end. It tries to find the first specific subsequence by moving a window of length  $l$ . The specificity of the subsequence is checked by performing the BLAST algorithm on the specificity database. If the subsequence contains a stretch of 15 identical bases with non-target sequence or shows an alignment with 75% or more similarity, it is considered non-specific. Then the program searches the second specific subsequence with the same method, taking into account  $l_{o_{min}}$  and  $l_{o_{max}}$ . When the two specific subsequences have been found, a small linker made of randomly chosen bases is added between the two subsequences. The specificity of the whole sequence is checked in order to verify that the introduction of the linker does not induce supplementary cross-hybridization.

The last step is the verification of additional constraints if needed. The melting temperature of oligonucleotides is computed using the nearest-neighbor model (SantaLucia, 1998), with the same parameters as the OligoArray software. The program calls the MFold software to check if the oligonucleotide has a stable secondary structure, and if it is the case, the sequence is rejected. The last point checked is the presence of forbidden sequences defined by the user (like repetition of bases). From a software development point of view, it is easy to add other constraint as it is facilitated by our object oriented design (Hill *et al.*, 2002). When a sequence is rejected, the windows of the two subsequences are moved along the sequence, until a correct oligonucleotide is found.

The next section will present some experimental verification we achieved with genes from *E.cuniculi*.

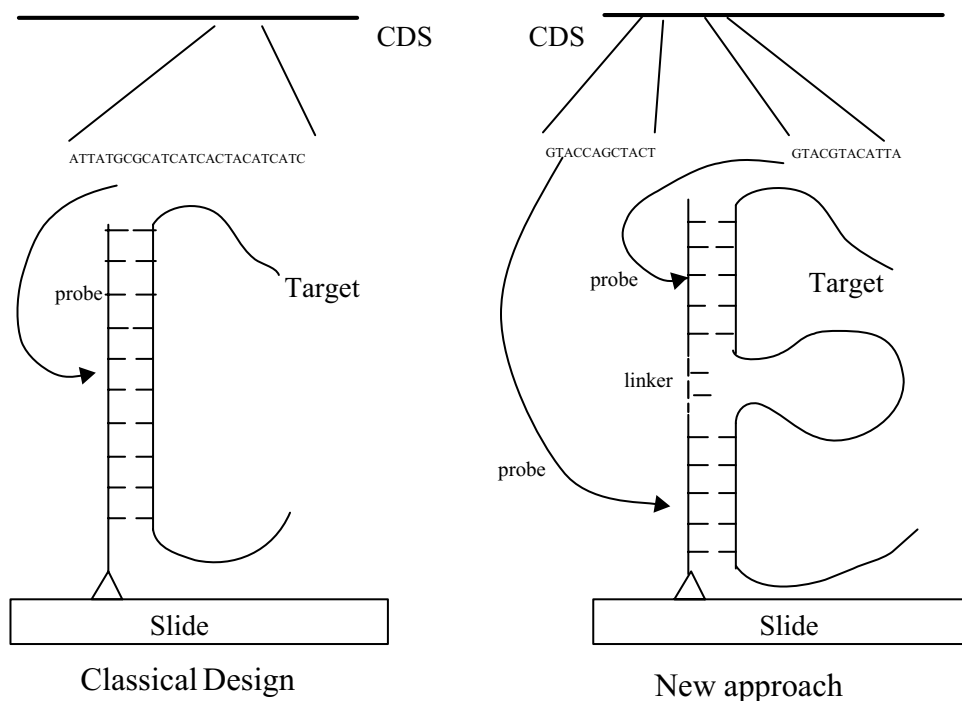

**Fig. 2.** Scheme of the new design of oligonucleotide for microarrays compared to classical design. In the common approach, the oligonucleotide is a specific subsequence of the CDS. In our new approach, the oligonucleotide is composed of two non-contiguous sequences from the CDS. A stable hybridization between the composite probe and the cDNA target induce the formation of a loop. A small linker composed of randomly chosen bases is added between the two sequences.

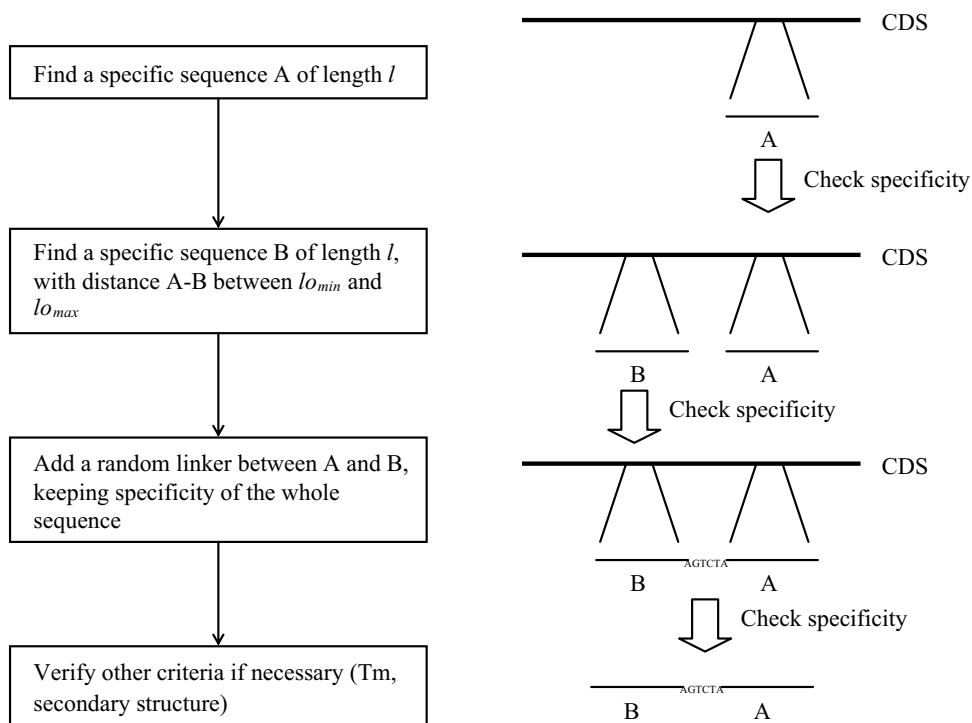

**Fig. 3.** Diagram describing the GoArrays algorithm.  $l$  is the length of the two subsequences constituting the oligonucleotide,  $l_{min}$  and  $l_{max}$  are the minimal and maximal loop size.

## RESULTS

### Oligonucleotide design

First we focused our study on two genes of *E. cuniculi*: polar tube protein *ptp1* and cytidylate kinase *kcy* that could induce cross-hybridization with standard oligonucleotide design. We designed a 50mer oligonucleotide for each of these two genes with OligoArray software (Rouillard *et al.*, 2002). Oligonucleotide probe *ptp1* shows a sequence similarity with *kcy* gene (16 identical bases on 17); thus there is a risk of cross-hybridization with *kcy* transcripts depending on the hybridization conditions. It is important to note that this 50mer oligonucleotide is the 'best' probe returned by the program, i.e. all other possible oligos show more similarity with *E. cuniculi* or human genes. Oligonucleotide probe *kcy* shows sequence similarity only with one human gene, and does not cross-hybridize with any *E. cuniculi* gene. The characteristics of these two standard oligonucleotides are summarized in Table 1.

We also designed oligonucleotide probes for these two genes with our new algorithm GoArrays. We calculated 25 oligonucleotides for each gene and designed chimerical oligonucleotides (two short specific oligonucleotides linking by 3, 4, 5 or 6 random nucleotides). Variations in chimerical oligonucleotides included size of the loop produced by the labeled target after hybridization, size of the linker between the two specific sequences, specificity threshold and size of the two subsequences constituting the oligonucleotide. The specificity threshold is the minimal length of a stretch of identical bases with non-target sequence that may lead to cross-hybridization (15 bases in Kane's criteria; we tested 16). The oligonucleotides are named regarding their characteristics, for example, the probe PTP1\_30\_6\_16\_20 produces a loop size of 30 bases, the linker is 6 bases long, the specificity threshold is fixed at 16 bases and the length of the two subsequences is 20 bases.

### Experimental procedure

For the Microarray production, the oligonucleotides probes (50mer) were synthesized by Eurogentec (<http://www.eurogentec.be>) with a 5' amino linker modification and the spotting was made by Eurogentec on aldehyde activated slides. The RNA transcripts *ptp1* and *kcy* (gene from *E. cuniculi*) were obtained by PCR reactions followed by *in vitro* transcription. PRC was conducted using the following primers (the bold part of the oligonucleotides permits the formation of a T7 promoter) as described in the third edition of the Molecular Cloning textbook (Sambrook and Russell, 2000):

*ptp1*DT7: **TAATACGACTCACTATAGGTACT**TTGCCCT-GATGAAGTTGGA

*ptp1*R: CAGCAGTGTTCATGGAGA

*kcy*DT7: **TAATACGACTCACTATAGGTACT**CAAGATTG-CCGTTGATGG

*kcy*R: TTCGTCGGCTGTTTCCTC

*In vitro* transcription was conducted using MEGAscript kit from Ambion (<http://www.ambion.com/>) according to the manufacturer's instructions. Then the labeling of the RNA transcripts (3 µg) with Cy3 and Cy5 was performed using the Amino Alkyl cDNA Labeling kit from Ambion (<http://www.ambion.com/>) according to the manufacturer's instructions. Hybridizations were carried out using 25 µl sample (DigEasy buffer from Boehringer 17 µl, labeled cDNA 5 µl, Salmon sperm DNA 1 µg/ml 3 µl) under a supported coverslip at

**Table 1.** Characteristics of standard 50mer oligonucleotides for two genes of *E. cuniculi*

| Name        | Sequence                                                     | Position within transcript | Tm | Possible cross-hybridization |
|-------------|--------------------------------------------------------------|----------------------------|----|------------------------------|
| <i>ptp1</i> | TAGGAACATGCAAGATTG-<br>CCGTATTGAAGCACTG-<br>CGACGCACCAGGAACA | 896                        | 90 | <i>Kcy</i>                   |
| <i>kcy</i>  | AGGAACAACAGGGTATTC-<br>CTAGACGGAGAGGACG-<br>TGTCGGAGAGCCTCCG | 450                        | 91 | gnl UG Hs#S1731224           |

There is a risk of cross-hybridization between *ptp1* probe and *kcy* transcripts.

37°C (water bath) for 16 h in a Corning chamber. After hybridization the microarrays were washed two times at room temperature for 5 min with the following solutions: 0.2X SSC, 0.1% SDS and 0.2X SSC. The slides were scanned on the Affymetrix 428 Array scanner to detect Cy3 and Cy5 fluorescence and raw data analysis was carried out using Jaguar from Affymetrix (<http://www.mwg-biotech.com/>). In the following sections, all data are signal means of replicates on the same array (three or six replicates depending on the considered oligo). Several hybridizations were made, but variation between arrays (due to hybridization conditions) could have introduced bias in the results.

### Comparative studies using OligoArray (standard design) and GoArrays (new design) for the oligonucleotides design

Figure 4 shows the two images of the microarray obtained after hybridization with *ptp1* mRNA labelled with Cy3 and *kcy* mRNA labelled with Cy5. PTP1 standard oligonucleotide (OligoArray design) hybridizes with high intensity like some new design oligonucleotides (but not all of them). The same phenomenon is observed on the Cy5 image with KCY oligonucleotides.

These observations are confirmed by the measurement of signal intensities with the Jaguar (Affymetrix) image analysis software (Table 2). The mean signal of all new design replicates is lower than the standard oligonucleotide, and the variations between new design oligonucleotides with different characteristics are very important. This emphasizes that some oligonucleotides do not hybridize with a high efficiency with their target. So, it is important to determine the best characteristics of the oligonucleotides avoiding cross-hybridizations and giving high sensitivity. Table 3 compares the characteristics of six new design oligonucleotides, three that show high signal and three that show very low signal. The features compared are GC percentage and size of the linker between the two subsequences. It seems that these characteristics influence the hybridization quality. Indeed, oligos with low signal have either poor GC percentage (for at least one subsequence) or a very small linker (one base). Furthermore, none of the spotted oligos with a loop size of more than 100 bases showed a significant signal. Thus, we may conclude that an oligonucleotide designed with our method must have a loop size lower than 100 bases, a linker size of more than 3 bases, and a sufficient GC percentage.

For each gene, we selected the four new design oligonucleotides that gave highest signal intensity. In order to check that the

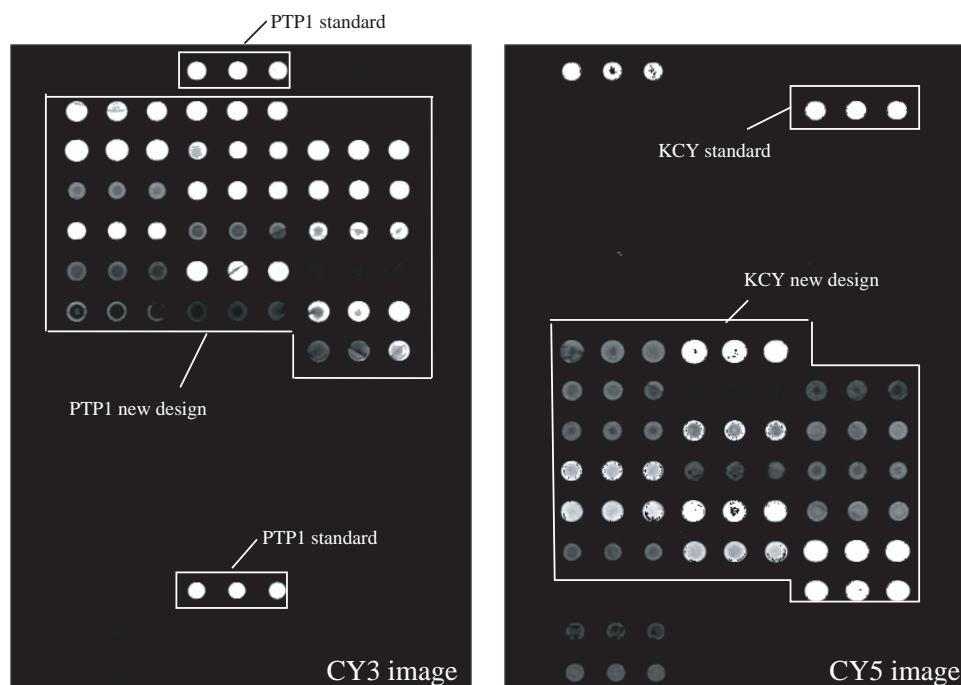

**Fig. 4.** Images of the test microarray. For two genes of *E.cuniculi*, probes were designed with the standard method (OligoArray) and with the new method (GoArrays) and spotted on the array. The slide was hybridized with *ptp1* transcripts labeled with Cy3 and *kcy* transcripts labeled with Cy5.

**Table 2.** Comparison of signal intensities of standard oligonucleotides and new design oligonucleotides (mean and standard deviation of all replicates)

|             | Signal intensity of standard oligos |                    | Signal intensity of new design oligos (all) |                    |
|-------------|-------------------------------------|--------------------|---------------------------------------------|--------------------|
|             | Mean                                | Standard deviation | Mean                                        | Standard deviation |
| <i>ptp1</i> | 18 277                              | 1213               | 14 989                                      | 9793               |
| <i>kcy</i>  | 44 231                              | 3744               | 13 793                                      | 9638               |

hybridization of the oligonucleotide with its target was actually on the entire length of the probe, we also spotted, for some of the oligonucleotides, the two corresponding 20mer subsequences A and B that constitute the chimerical oligonucleotides, and a third oligonucleotide that is a compound of one subsequence of 20mer (A or B) linked with a random sequence of approximately 20mer. Signal intensities of those oligonucleotides are reported in Table 4.

For *kcy*, the signal of the new design oligonucleotides (from 33 842 to 42 011) is just a little bit lower than standard oligonucleotide (44 231). The signal of new design oligonucleotides is approximately 72% of standard signal, except one oligonucleotide which is nearly at the same level as for standard oligonucleotide. Concerning *ptp1*, the trend is inverted: the signal of new design oligonucleotides (from 31 403 to 33 499) is higher than standard oligonucleotide (18 277). The signal of corresponding 20mer sequences is much lower and quasi-zero for some of them.

These results clearly demonstrate that oligonucleotides designed with our new method (GoArrays) can hybridize their target with a high specificity and sensitivity. We demonstrate that the

hybridization of our chimerical oligonucleotides is effective all along the two subsequences without a destabilisation induced by the loop formation.

### New oligonucleotides design with GoArrays avoid cross-hybridization

Hybridization of the test microarray described in the previous section was repeated several times. We detected a signal intensity of *ptp1* standard oligonucleotide in the Cy5 image, which represents cross-hybridization of this oligonucleotide with the *kcy* transcript. This result demonstrates that under certain conditions of hybridizations (salt concentration, temperature variation), cross-hybridization may occur. We never observed cross-hybridization with our new design. Table 5 shows signals in the Cy5 channel for the standard *ptp1* probe, and for two new design probes. The latter do not give any signal whereas standard PTP1 shows a signal. Under real conditions of hybridization, this signal would be added to the target signal (*kcy*) and would modify the measure inducing a misinterpretation of the biological process. Our design enables avoiding cross-hybridization by offering more candidates when searching for highly specific sequences within the CDS.

### Hybridization with complex biological sample

We also hybridized a microarray with a more complex biological sample, under conditions that are closer to real transcriptomic studies of our biological model. Targets were composed of a mixture of *E.cuniculi* transcripts and host cell transcripts (human). Total RNA was extracted from HFF cell culture infested or not by the parasite using RNeasy kit from Qiagen (<http://www.qiagen.com>). Cell culture and infestation by *E.cuniculi* were made as previously described

**Table 3.** Comparison of characteristics of new design oligonucleotides: %GC and linker size

| Oligonucleotide new design | Signal intensity | %GC of first subsequence | %GC of second subsequence | Linker size |
|----------------------------|------------------|--------------------------|---------------------------|-------------|
| KCY_BACSU_30_3_16_20       | 42 011           | 60                       | 45                        | 3           |
| PTP1_30_4_16_20            | 31 611           | 60                       | 55                        | 4           |
| PTP1_40_6_16_20            | 31 403           | 60                       | 40                        | 6           |
| KCY_BACSU_10_4_16_20       | 6 222            | 35                       | 45                        | 4           |
| PTP1_20_6_15_20            | 6 670            | 70                       | 35                        | 6           |
| PTP1_20_1_15_23            | 662              | 65                       | 45                        | 1           |

**Table 4.** Signal intensities of new design oligonucleotides with GoArrays

| Oligonucleotide new design | Signal intensity | Signal intensity of corresponding 20mer oligo (sequence A) | Signal intensity of corresponding 20mer oligo (sequence B) | Signal intensity of oligo 48mer with sequence A+ random sequence |
|----------------------------|------------------|------------------------------------------------------------|------------------------------------------------------------|------------------------------------------------------------------|
| KCY_BACSU_10_4_15_20       | 32 842           | 1 355                                                      | 20 805                                                     | 5 176                                                            |
| KCY_BACSU_10_5_16_20       | 33 896           | —                                                          | —                                                          | —                                                                |
| KCY_BACSU_30_3_16_20       | 42 011           | 10 724                                                     | 1 820                                                      | 8 052                                                            |
| KCY_BACSU_100_6_16_20      | 33 919           | —                                                          | —                                                          | —                                                                |
| PTP1_30_4_16_20            | 31 611           | 412                                                        | 6 291                                                      | 2 146                                                            |
| PTP1_30_5_16_20            | 31 683           | —                                                          | —                                                          | —                                                                |
| PTP1_30_6_16_20            | 33 499           | 2 575                                                      | 11                                                         | 4 051                                                            |
| PTP1_40_6_16_20            | 31 403           | —                                                          | —                                                          | —                                                                |

Signal intensities of the four oligonucleotides giving highest signal are reported and compared with the corresponding 20mer oligonucleotides subsequences. For example, the oligonucleotide KCY\_BACSU\_10\_4\_15\_20 is composed by the subsequence A (20mer) + the linker (4mer) + the subsequence B (20mer); then we spotted sequence A alone, sequence B alone, and A + a random sequence (20mer).

**Table 5.** Cross-hybridization measurement

|                 | Signal intensity | Background intensity |
|-----------------|------------------|----------------------|
| PTP1 standard   | 1361             | 93                   |
| PTP1_30_6_16_20 | No signal        | 53                   |
| PTP1_30_5_16_20 | No signal        | 50                   |

Cy5 signal for PTP1 oligonucleotide indicates a cross-hybridization between the PTP1 probe and the *ky* transcript. This cross-hybridization has never been observed for new design probes.

(Peyret *et al.*, 2001). OligodT primer was used for the labeling step of the cDNAs using the Amino Allyl cDNA Labeling kit from Ambion (<http://www.ambion.com/>).

Table 6 reports spot intensities in the Cy3 channel for PTP1 standard oligo as well as a selection of chimerical oligos. Chimerical oligos hybridize with targets, with signals even higher than standard oligo. Signal variation among chimerical oligos can be explained by oligo characteristics as described in the previous section. Results for the second gene are not shown because the signal for KCY standard oligo was very low, and thus less significant. However, the results showed nearly the same trend as for PTP1: the signal of chimerical oligos was equal to or higher than the signal of standard oligos.

**Table 6.** Hybridization with a complex biological sample

|                 | Signal intensity | Background intensity |
|-----------------|------------------|----------------------|
| PTP1 standard   | 5 126            | 2 235                |
| PTP1_10_5_16_22 | 12 089           | 2 084                |
| PTP1_10_6_16_22 | 15 979           | 2 035                |
| PTP1_30_5_15_20 | 6 361            | 2 052                |
| PTP1_30_6_15_20 | 9 114            | 1 769                |
| PTP1_40_6_16_20 | 7 491            | 1 971                |

Signal and background intensities are reported for PTP1 standard oligo as well as for a selection of new design oligos.

## DISCUSSION

In this paper, we showed that the classical approach for oligo design is not always adapted to complex biological models. The critical factor is cross-hybridization which could introduce misinterpretation of biological results. By a conventional probe design we were able to determine specific 50mer oligonucleotides for only approximately 40% of the CDSs in our biological model, *E.cuniculi*. We developed a new probe design strategy (GoArrays) based on the determination of two specific subsequences. In this context, we were able to design specific probes for each CDS of the genome,



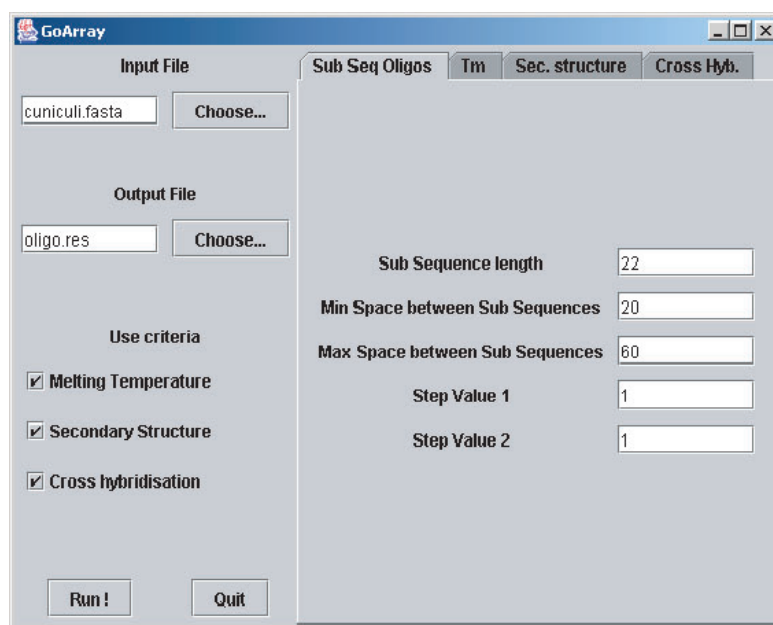

Fig. 5. Screenshot of GoArrays interface

except perfect duplications. Experimental tests have demonstrated that oligonucleotides designed with our new method can hybridize their targets with a high specificity and sensitivity. We have shown that oligo characteristics like loop size, linker size or GC% of subsequences seem to be important for the quality of hybridization between a new design probe and its target.

In addition to the originality of the oligo design implemented in GoArrays (Figure 5), we have paid attention to the quality of the software design following the Object Management Groups recommendation (use and extension of the MAGE Object-Model) (Hill *et al.*, 2002). However, it is difficult to compare the results of oligo design software. Indeed, for the same gene, two programs can provide different oligos, but both can be completely satisfactory and compatible with the criteria provided by the user. Only two programs considering exactly the same criteria for their research and proposing the same user options should provide the same results. If we can provide the same results then the efficiency of the software in computing time can be an additional comparison element. Our prototype will therefore be rewritten in C++; we have already achieved some testing of distributed implementation (Rimour *et al.*, 2003) and the development of a Web-based oligonucleotide database is envisaged.

## ACKNOWLEDGEMENTS

This work was supported by a grant from the CNRS 'puces à ADN'. S.R. and C.M. were supported by a grant from 'Ministère de l'éducation, de la recherche et de la technologie'.

## REFERENCES

Altschul,S.F., Madden,T.L., Schaffer,A.A., Zhang,J., Zhang,Z., Miller,W. and Lipman,D.J. (1997) Gapped BLAST and PSI-BLAST: a new generation of protein database search programs. *Nucleic Acids Res.*, **25**, 3389–3402.  
 Bernal,A., Ear,U. and Kyripides,N. (2001) Genomes OnLine Database (GOLD): a monitor of genome projects world-wide. *Nucleic Acids Res.*, **29**, 126–127.

Chen,H. and Sharp,B.M. (2002) Oliz, a suite of Perl scripts that assist in the design of microarrays using 50mer oligonucleotides from the 3' untranslated region. *BMC Bioinformatics*, **3**, 27.  
 DeRisi,J.L., Iyer,V.R. and Brown,P.O. (1997) Exploring the metabolic and genetic control of gene expression on a genomic scale. *Science*, **278**, 680–686.  
 Goldmann,T. and Gonzalez,J.S. (2000) DNA-printing : utilization of a standard inkjet printer for the transfer of nucleic acids to solid supports. *J. Biochem. Biophys. Methods*, **42**, 105–110.  
 Hill,D., Rimour,S. and Peyret,P. (2002) MAGE compliant object model for oligonucleotide design in microarray experiments: application to the eukaryotic parasite *Encephalitozoon cuniculi*. In *Proceedings of Objects in Bio- & Chem-Informatics*, OMG Object Management Group, Washington, DC, pp. 39–44.  
 Hughes,T.R., Mao,M., Jones,A.R., Burchard,J., Marton,M.J., Shannon,K.W., Lefkowitz,S.M., Ziman,M., Schelter,J.M., Meyer,M.R. *et al.* (2001) Expression profiling using microarrays fabricated by an ink-jet oligonucleotide synthesizer. *Nat. Biotechnol.*, **19**, 342–347.  
 Kane,M.D., Jatkoe,T.A., Stumpf,C.R., Lu,J., Thomas,J.D. and Madore,S.J. (2000) Assessment of the sensitivity and specificity of oligonucleotide (50mer) microarrays. *Nucleic Acids Res.*, **28**, 4552–4557.  
 Katinka,M.D., Duprat,S., Cornillot,E., Metenier,G., Thomarat,F., Prensier,G., Barbe,V., Peyretailade,E., Brottier,P., Wincker,P. *et al.* (2001) Genome sequence and gene compaction of the eukaryote parasite *Encephalitozoon cuniculi*. *Nature*, **414**, 450–453.  
 Kurata,K., Breton,V., Saguez,C. and Dine,G. (2003) Evaluation of unique sequences on the European data grid. In *Proceedings of Asia Pacific Bioinformatics Conference (APBC 2003)*. Australian Computer Society, Inc., Darlinghurst, Australia, pp. 43–52.  
 Li,F. and Stormo,G.D. (2001) Selection of optimal DNA oligos for gene expression arrays. *Bioinformatics*, **17**, 1067–1076.  
 Lipshutz,R.J., Fodor,S.P., Gingeras,T.R. and Lockhart,D.J. (1999) High density synthetic oligonucleotide arrays. *Nat. Genet.*, **21**, 20–24.  
 Lockhart,D.J. and Barlow,C. (2001) Expressing what's on your mind: DNA arrays and the brain. *Nat. Rev. Neurosci.*, **2**, 63–68.  
 Lockhart,D.J., Dong,H., Byrne,M.C., Follettie,M.T., Gallo,M.V., Chee,M.S., Mittmann,M., Wang,C., Kobayashi,M., Horton,H. and Brown,E.L. (1996) Expression monitoring by hybridization to high-density oligonucleotide arrays. *Nat. Biotechnol.*, **14**, 1675–1680.  
 Nielsen,H.B., Wernersson,R. and Knudsen,S. (2003) Design of oligonucleotides for microarrays and perspectives for design of multi-transcriptome arrays. *Nucleic Acids Res.*, **31**, 3491–3496.  
 Object Management Group (2003) Gene Expression, v1.1, OMG Final Adopted Specification, OMG document formal/03-10-01.

- Peyret,P., Katinka,M., Duprat,S., Duffieux,F., Barbe,V., Barbazanges,M., Weissenbach,J., Saurin,W., Vivares,C.P. (2001) Sequence and analysis of chromosome I of the amitochondriate intracellular parasite *Encephalitozoon cuniculi* (Microspora). *Genome Res.*, **11**, 198–207.
- Raddatz,G., Dehio,M., Meyer,T.F. and Dehio,C. (2001) PrimeArray: genome-scale primer design for DNA-microarray construction. *Bioinformatics*, **17**, 98–99.
- Rahmann,S. (2003) Fast large scale oligonucleotide selection using the longest common factor approach. *J. Bioinformatics Computat. Biol.*, **1**, 343–361.
- Relogio,A., Schwager,C., Richter,A., Ansorge,W. and Valcarcel,J. (2002) Optimization of oligonucleotide-based DNA microarrays. *Nucleic Acids Res.*, **30**, e51.
- Reymond,N., Charles,H., Duret,L., Calevro,F., Beslon,G. and Fayard,J.M. (2004) ROSO: optimizing oligonucleotide probes for microarrays. *Bioinformatics*, **20**, 271–273.
- Rimour,S., Hill,D. and Peyret,P. (2003) Using distributed computing for the design of oligonucleotides in micro-arrays experiments. In *Proceedings of the First Healthgrid Conference*. European Communities Publications, Lyon, France, pp. 88–96.
- Rouillard,J.M., Herbert,C.J. and Zuker,M. (2002) OligoArray: genome-scale oligonucleotide design for microarrays. *Bioinformatics*, **18**, 486–487.
- Rouillard,J.M., Zuker,M. and Gulari,E. (2003) OligoArray 2.0: design of oligonucleotide probes for DNA microarrays using a thermodynamic approach. *Nucleic Acids Res.*, **31**, 3057–3062.
- Sambrook,J. and Russell,D.W. (2000) *Molecular Cloning: A Laboratory Manual*. 3rd edn. Cold Spring Harbor Laboratory Press.
- SantaLucia,J.Jr. (1998) A unified view of polymer, dumbbell, and oligonucleotide DNA nearest-neighbor thermodynamics. *Proc. Natl Acad. Sci., USA*, **95**, 1460–1465.
- Schena,M., Shalon,D., Davis,R.W. and Brown,P.O. (1995) Quantitative monitoring of gene expression patterns with a complementary DNA microarray. *Science*, **270**, 467–470.
- Talla,E., Tekaiia,F., Brino,L. and Dujon,B. (2003) A novel design of whole-genome microarray probes for *Saccharomyces cerevisiae* which minimizes cross-hybridization. *BMC Genomics*, **4**, 38.
- Wang,X. and Seed,B. (2003) Selection of oligonucleotide probes for protein coding sequences. *Bioinformatics*, **19**, 796–802.
- Zuker,M., Mathews,D.H. and Turner,D.H. (1999) *Algorithms and Thermodynamics for RNA Secondary Structure Prediction: A Practical Guide*. NATO ASI Series, Kluwer, Dordrecht.
